# Supplementary material for: Poplar trees reconfigure the transcriptome and metabolome in response to drought in a genotype- and time-of-day-dependent manner
Source: PubMed Central journal article supplement (PMC4437445; doi:10.1186/s12864-015-1535-z), 2015-04-21
Supplement: 12864_2015_1535_MOESM5_ESM.pdf [file 12864_2015_1535_MOESM5_ESM.pdf]

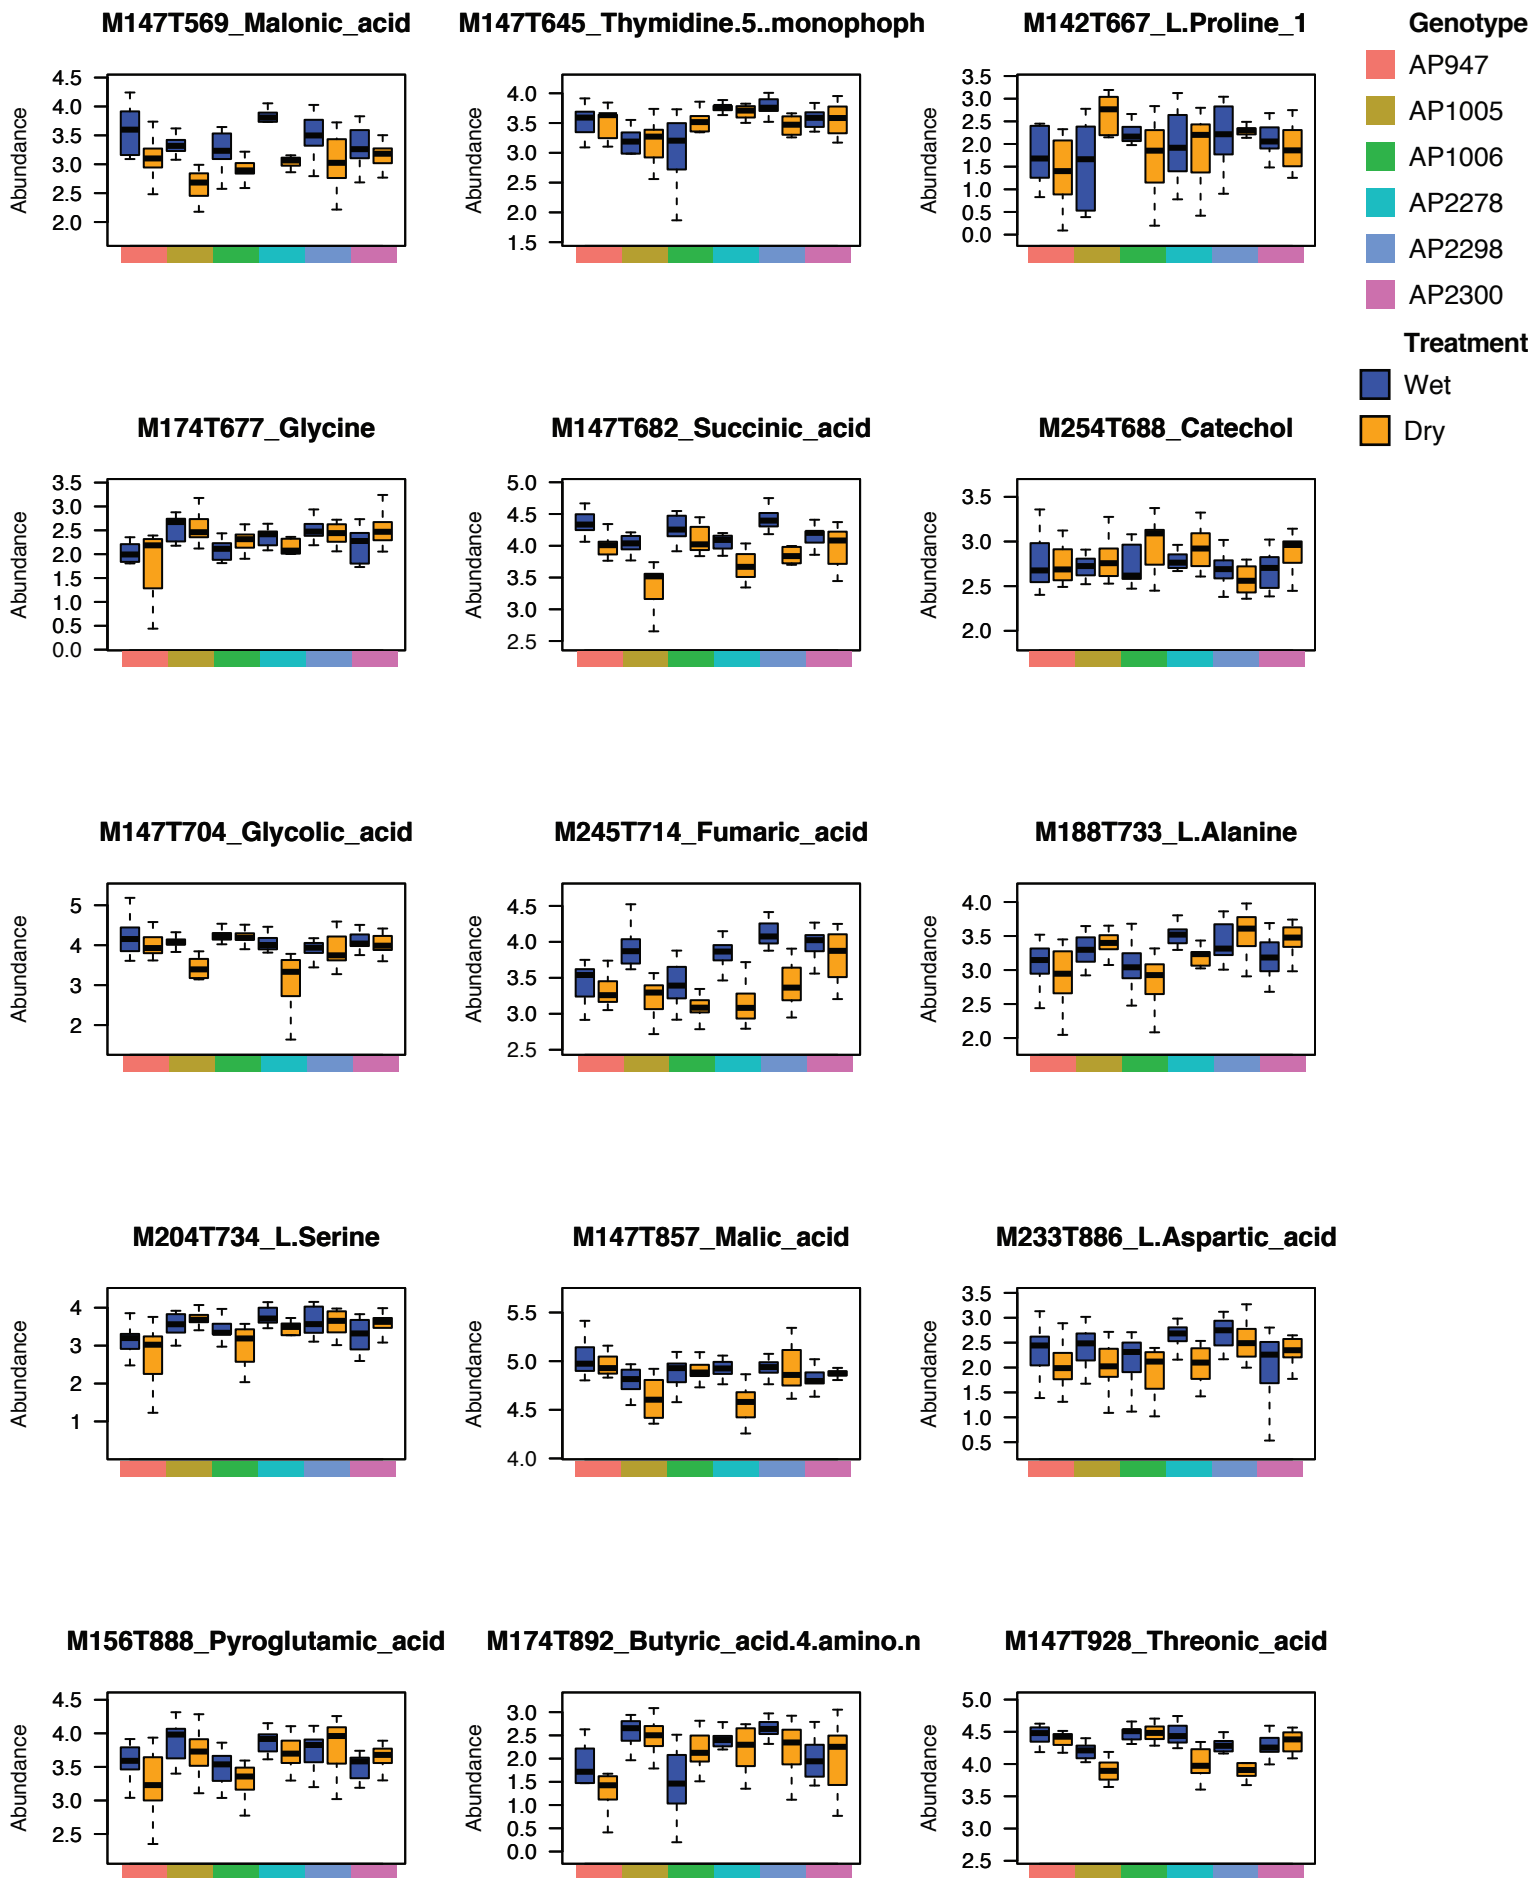

Supplementary Figure S4

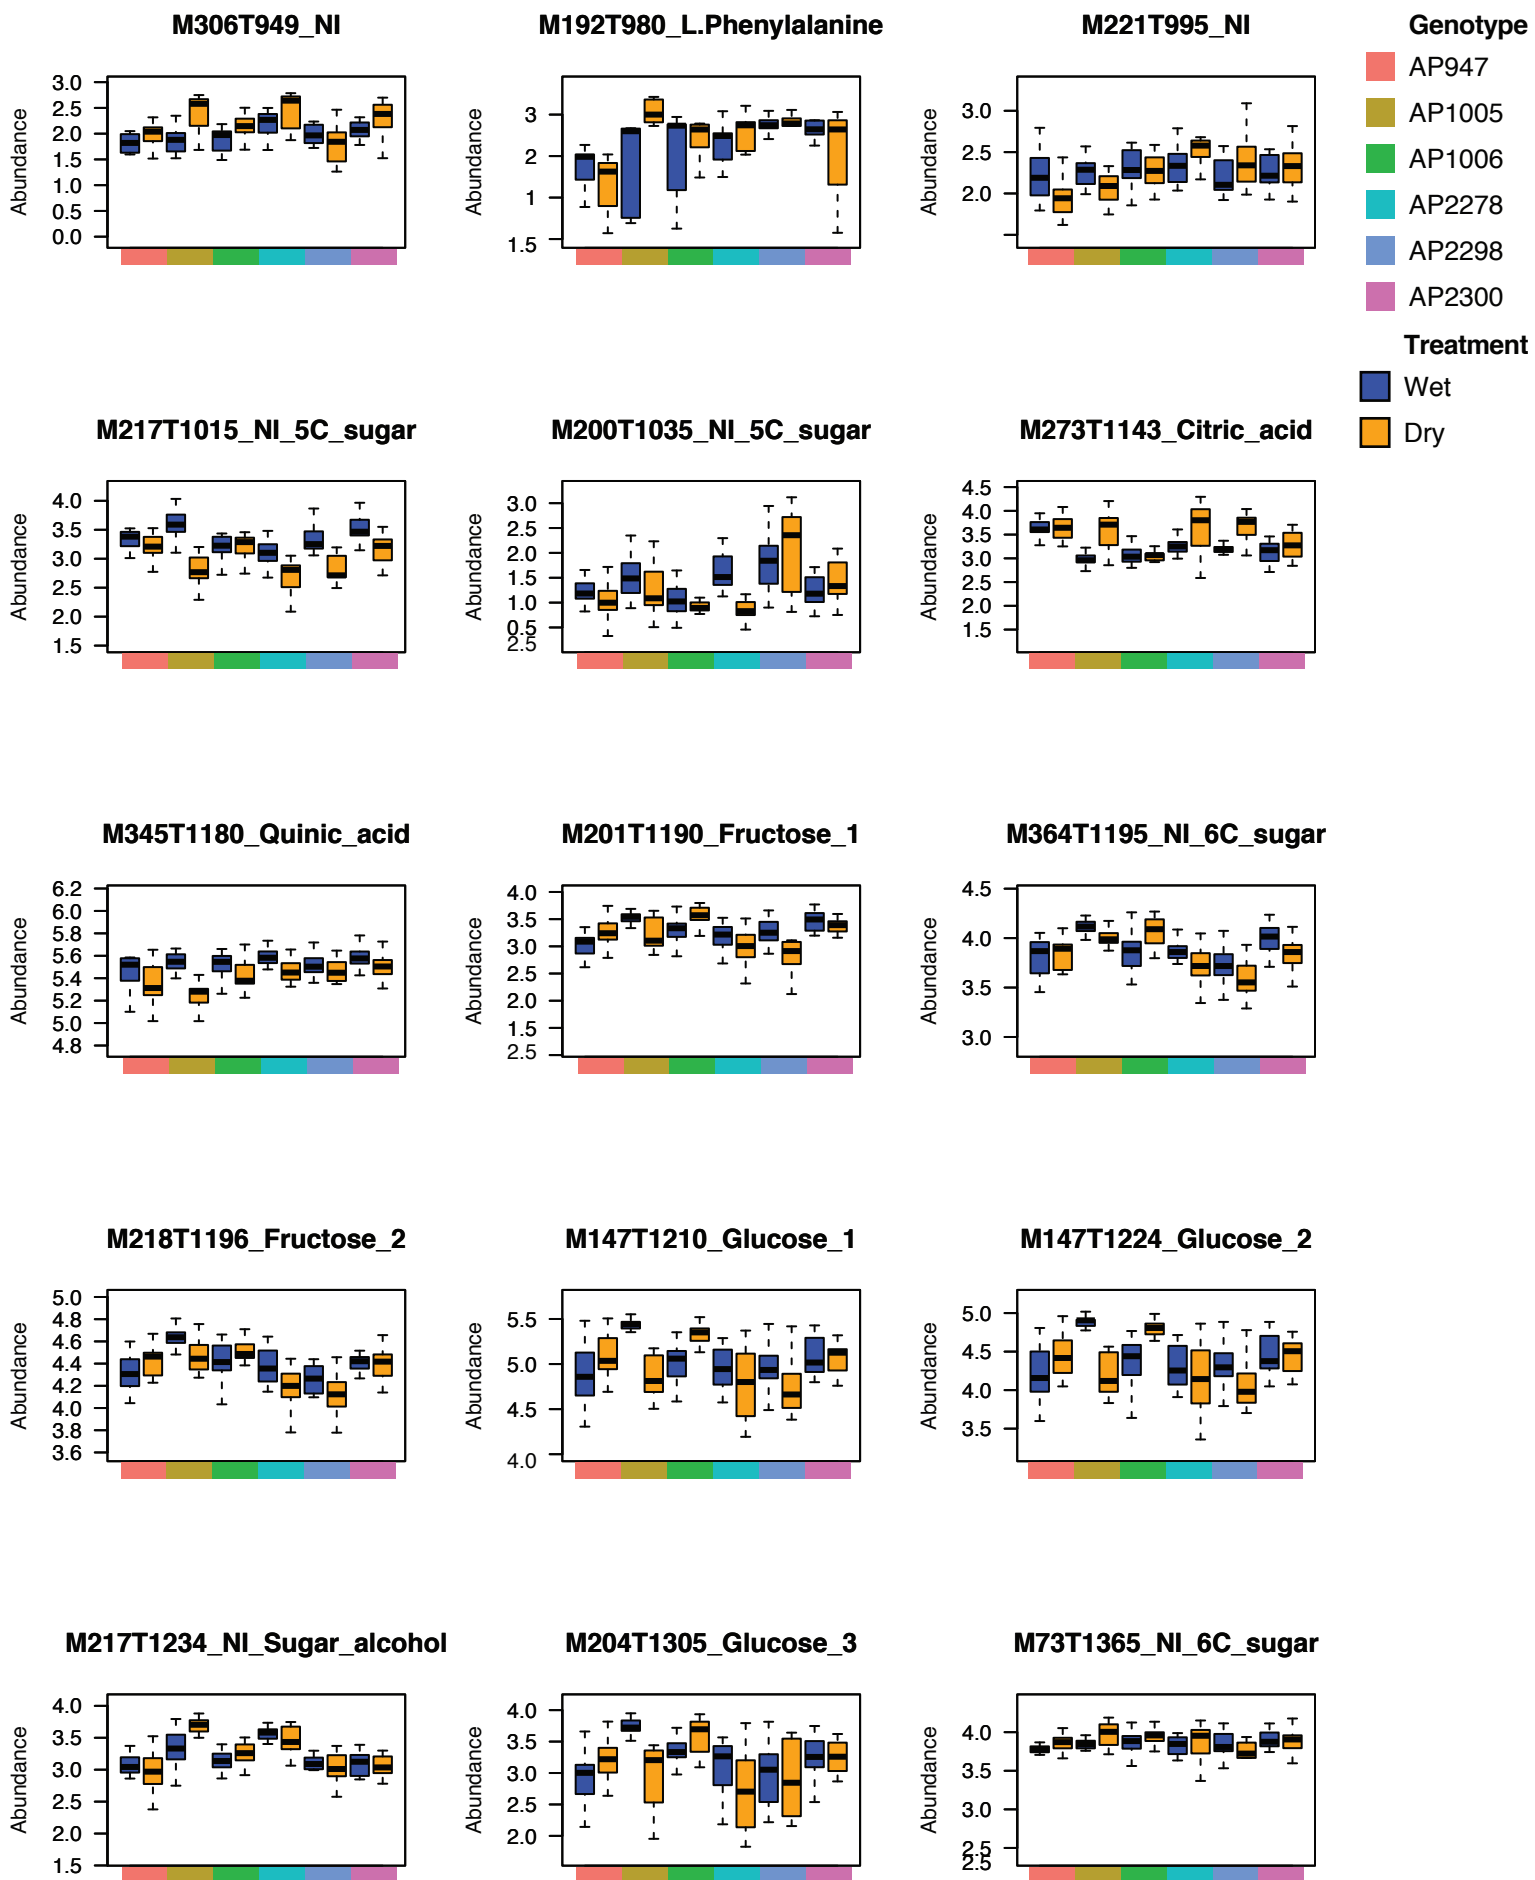

Supplementary Figure S4

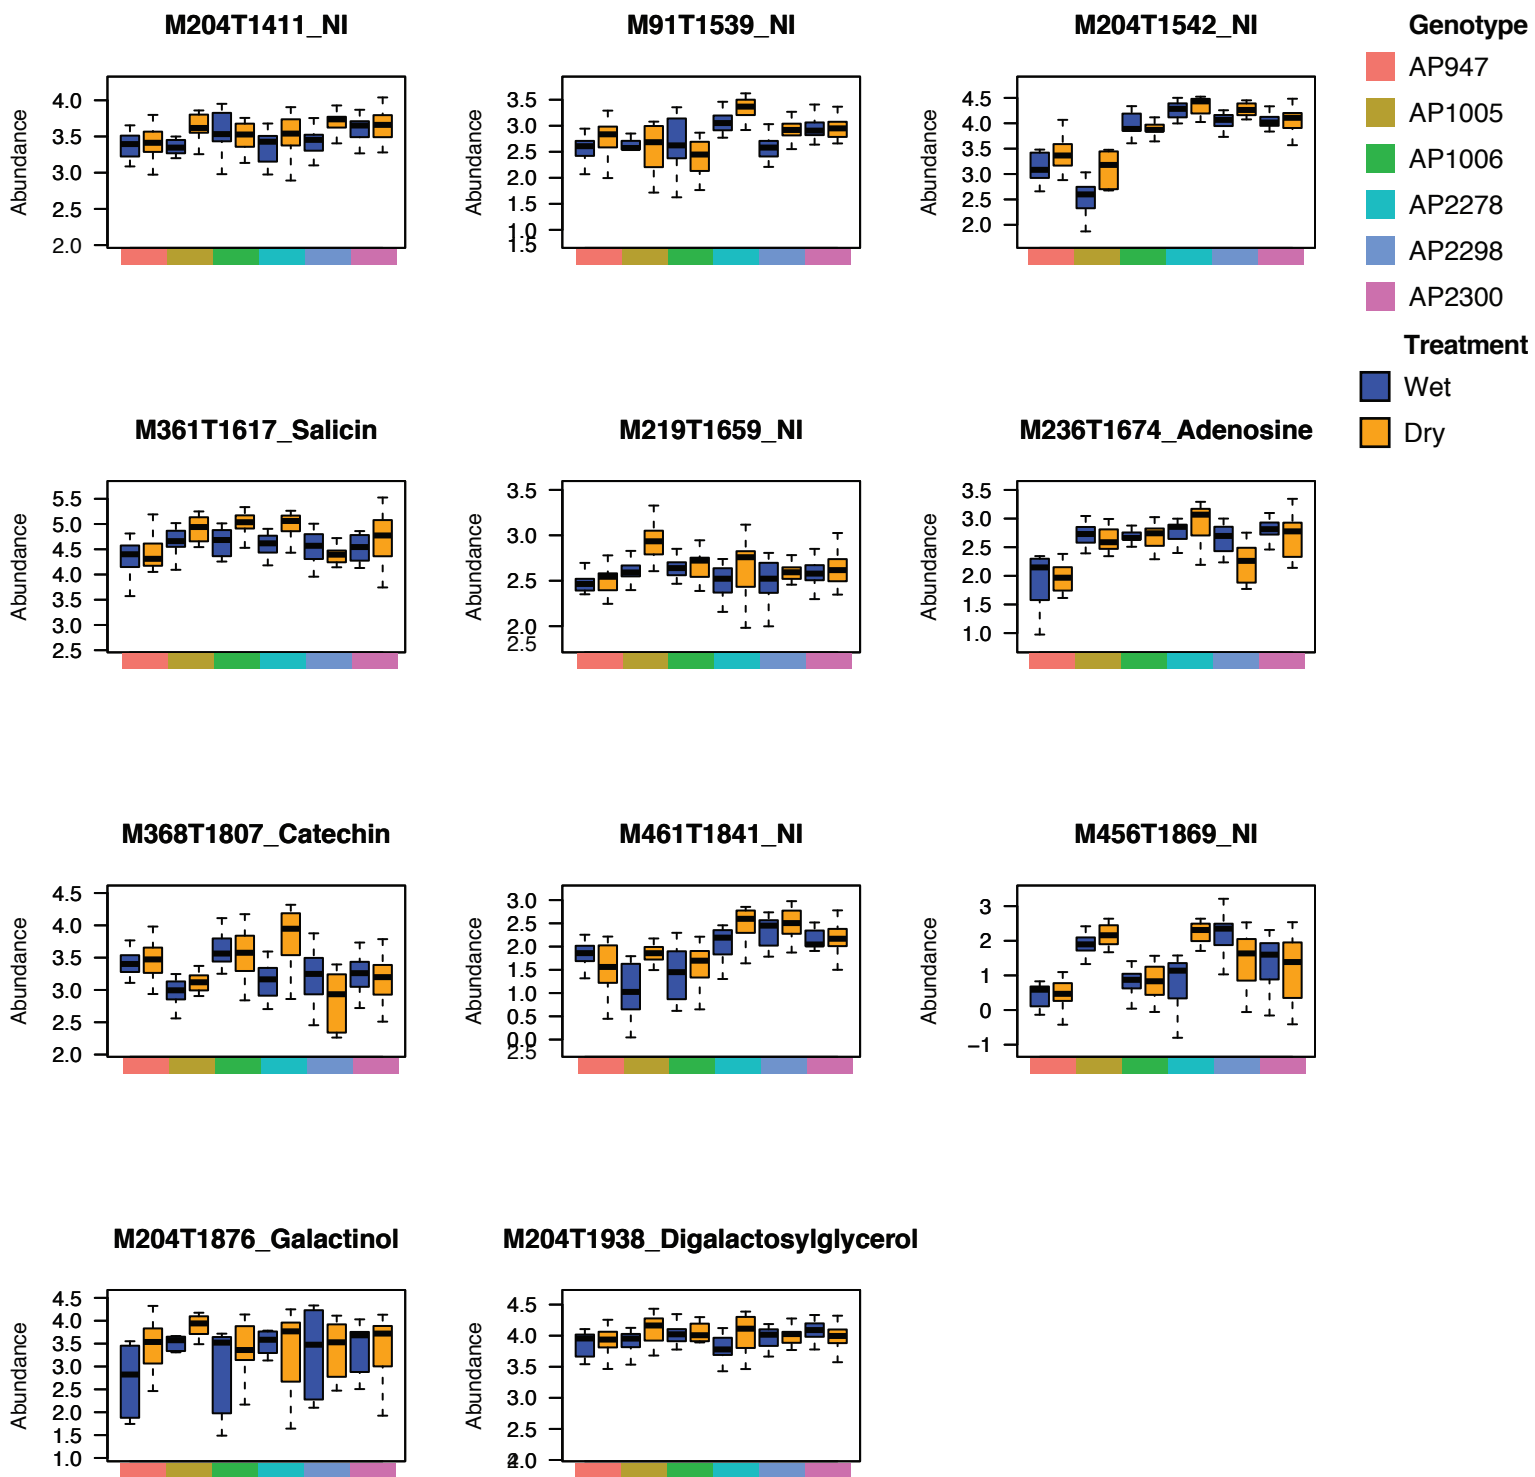

Supplementary Figure S4
